# Supplementary figures and images for: Co-Administration of Remdesivir and Azithromycin May Protect against Intensive Care Unit Admission in COVID-19 Pneumonia Requiring Hospitalization: A Real-Life Observational Study
Source: MDPI journal article supplement (doi:10.3390/antibiotics11070941), 2022-07-14

## Supplementary Figure S1

### Modified CONSORT 2010 Flow Diagram of the Study

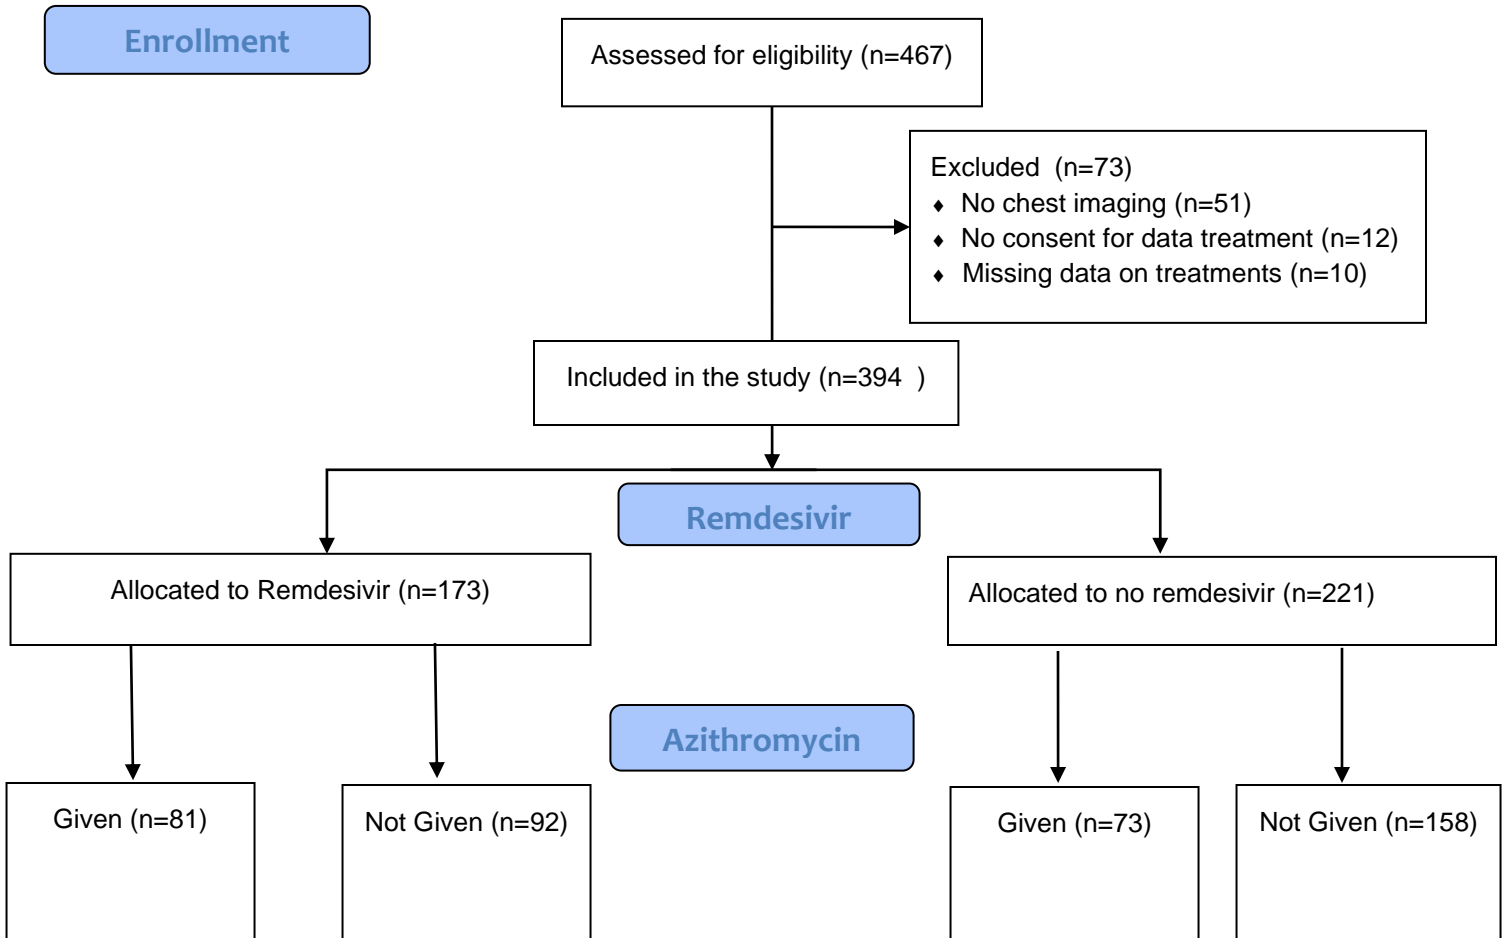

Supplement: s1 [file s1]
